# Supplementary material
Source: publisher figshare collection journal article supplement (https://gsapubs.figshare.com/ndownloader/files/39537019)
Supplement: Supplementary file 1 [file 39537019]

## Sheet: Table S2
Table S2. Whole-rock major- (wt%), trace- (ppm), and rare earth (ppm) element compositions for the dioritic and granitic rocks of the Mangling intrusive complex.
Sample No.	ML20-006	ML20-010	ML21-005	ML21-007	ML21-011	ML21-013	ML20-011	ML20-012	ML20-013	ML20-014	ML21-015	ML21-016	ML20-005	ML20-007	ML20-008	ML20-009	ML21-012	ML21-014	ML20-001	ML20-002	ML20-003	ML20-004	ML21-021	ML21-022	P003-2	P003-3	P003-4	P003-5	ML21-023
Rock type	Biotite diorite enclave						Biotite diorite						Medium- to fine-grained monzogranite						Fine-grained monzogranite						K-feldspar granite
SiO2	58.69	51.33	52.9136	53.1634	54.2071	57.0458	56.8	55.62	55.92	55.93	58.036	58.1647	67.9	73.35	71.35	72.1	74.9036	74.0079	70.16	71.25	71.88	70.09	74.8272	74.4688	79.5864	81.1286	80.5957	81.8785	73.4581
TiO2	0.7	1.38	1.23119	1.16389	0.93813	1.14785	1.04	1.05	1.04	1.09	0.996685	0.893391	0.41	0.23	0.21	0.32	0.197058	0.243456	0.34	0.28	0.28	0.35	0.263561	0.268719	0.184051	0.277666	0.256386	0.273048	0.2329
Al2O3	20.19	16.96	17.5486	16.5416	16.6117	15.5773	15.55	15.59	15.46	15.81	15.4588	14.9498	15.52	13.65	14.72	13.77	12.0539	12.9744	15.14	14.63	14.44	14.94	12.387	12.755	8.39864	6.72844	7.21983	6.58947	13.3822
Fe2O3T	4.59	8.57	9.04833	9.58869	7.22396	7.36077	7.35	7.67	7.75	7.58	7.0799	7.08986	3.26	2.01	1.85	2.65	1.52571	1.75018	2.42	2.16	1.98	2.54	1.67057	1.69242	1.79798	1.61029	1.67205	1.58618	1.87935
MnO	0.14	0.31	0.278766	0.328859	0.23414	0.121302	0.13	0.13	0.13	0.13	0.125837	0.115588	0.1	0.08	0.08	0.1	0.0509589	0.0305119	0.07	0.07	0.06	0.07	0.0256686	0.0240672	0.0599686	0.0367442	0.0449976	0.0414653	0.0437233
MgO	1.11	3.45	4.04337	4.74948	3.06612	3.10449	4.36	4.66	4.53	4.29	4.40963	4.50393	0.74	0.36	0.43	0.67	0.450816	0.499162	0.5	0.41	0.37	0.52	0.343056	0.34691	0.194176	0.207581	0.226451	0.16366	0.35759
CaO	3.2	5.42	3.9743	4.9107	6.17069	4.58818	6.04	6.37	6.27	6.17	6.38698	6.3966	2.27	1.3	1.39	1.93	1.57929	1.24941	1.66	1.57	1.32	1.68	1.5309	1.45886	0.688298	0.530148	0.42907	0.609053	1.19809
Na2O	6.12	4.81	4.58603	4.38459	4.64418	4.34643	3.18	3.2	3.19	3.43	3.33356	3.08479	3.74	3.39	3.55	3.85	3.58323	3.63608	3.9	3.84	3.64	3.94	3.67477	3.62344	3.759	3.95698	4.02569	3.80968	3.92776
K2O	3.79	2.16	1.5274	2.37351	1.3518	1.09634	3.22	2.57	2.82	2.61	2.26287	2.78415	4.32	4.77	5.21	3.26	4.43115	4.12654	4.5	4.38	4.74	4.51	4.31758	4.28697	4.38737	4.38322	4.49905	4.27651	3.98678
P2O5	0.2	0.88	0.854107	0.707657	0.555542	0.848853	0.55	0.6	0.58	0.58	0.589821	0.473193	0.19	0.08	0.08	0.13	0.0775059	0.1035	0.15	0.11	0.08	0.16	0.0885254	0.0911601	0.0926082	0.0899816	0.100936	0.0777425	0.104513
LOI	0.383289	3.78389	3.76633	1.8668	4.80701	3.91304	0.872443	1.68865	1.38334	1.62132	1.37003	1.23166	0.72	0.320513	0.484823	0.520532	0.663253	1.04687	0.344474	0.523128	0.58648	0.31746	0.633143	0.697425	0.736377	0.92908	0.849082	0.633831	1.27084
TOTAL	99.1133	99.0539	99.7721	99.7792	99.8103	99.1504	99.0924	99.1486	99.0733	99.2413	100.05	99.6877	99.17	99.5405	99.3548	99.3005	99.5165	99.6681	99.1845	99.2231	99.3765	99.1175	99.762	99.7138	99.8849	99.8787	99.9192	99.9392	99.8418
K2O+Na2O	9.91	6.97	6.11343	6.75811	5.99598	5.44277	6.4	5.77	6.01	6.04	5.59643	5.86895	8.06	8.16	8.76	7.11	8.01438	7.76262	8.4	8.22	8.38	8.45	7.99236	7.91041	8.14637	8.3402	8.52474	8.08619	7.91454
A/CNK	1.01011	0.843579	1.06853	0.884097	0.81742	0.933971	0.789423	0.794303	0.784788	0.803137	0.790916	0.758186	1.03775	1.04173	1.05096	1.02984	0.888796	1.02003	1.05841	1.05159	1.06818	1.03624	0.917435	0.962405	0.689321	0.550717	0.588307	0.548975	1.03299
A/NK	1.42485	1.65454	1.90799	1.69104	1.82485	1.86852	1.78397	1.93764	1.86265	1.86714	1.94863	1.84836	1.43328	1.27099	1.28233	1.39627	1.12751	1.24181	1.34144	1.32305	1.29874	1.31479	1.15567	1.2032	0.768225	0.597886	0.628242	0.604766	1.24178
Mg#	36.0444	48.4053	51.0144	53.5822	49.7273	49.5692	58.0263	58.608	57.6668	56.8775	59.209	59.6852	34.5982	29.4484	35.1359	37.0761	40.7799	39.9281	32.5012	30.6693	30.3377	32.3002	32.3673	32.3273	20.1077	23.1019	23.9905	19.3847	30.7206
Sc	3.1928	16.1847	24.7	25.4	28.4	26.2	12.5735	14.1721	13.3711	14.7968	17	21	3.05858	1.73242	1.77115	2.28869	5.11	5.6	1.78209	1.18477	1.86289	2.40232	5.24	5.89	10.9	11.6	11.7	10.9	4.73
V	48.6992	118.652	64.8	76.3	74.6	102	152.6	141.812	149.49	155.996	63	67.1	31.5677	16.4134	19.1409	27.1725	22.1	23.8	25.551	19.6465	19.0817	27.9593	21.1	22	19.6	21.6	22.4	19	21.7
Cr	5.51831	55.8877	47.5	55.5	17.3	76.3	117.295	122.561	125.784	131.78	113	140	10.5716	17.6813	15.8265	15.6172	7.83	6.76	8.42801	7.77492	18.4996	19.4181	7.3	3.39	23.3	11.8	13.2	17.5	2.68
Co	5.71176	17.7066	20.8	22.7	18.9	18.2	22.9722	21.9668	23.8965	23.2717	23	23.3	3.51682	2.17928	2.49409	3.79461	1.9	1.94	3.18397	2.47913	2.13639	3.39267	1.28	1.2	2.53	2.29	2.49	2.03	2.38
Ni	2.89508	25.6441	21.8	17.9	10.8	44.7	55.1462	51.6737	56.3118	55.8666	47.9	36.5	1.99208	1.98764	2.51699	4.56729	1.8	1.97	1.56135	1.38857	1.24706	1.9762	1.63	1.53	2.72	1	1.86	0.568	0.0233
Ga	25.8616	34.5931	35.7	33.1	30.2	34.3	20.4594	19.5866	19.8742	20.5987	20	19	20.9573	16.6696	17.1251	19.1153	18	19.9	20.4787	19.6827	20.105	20.8724	20.6	21.1	19.7	19.2	19.4	20	18.4
Rb	67.7291	117.558	76.8	134	76.2	99.1	97.5909	86.677	69.7102	79.6765	56.1	101	100.013	140.32	158.933	108.653	85.4	79.1	137.576	131.973	145.354	132.8	68.7	71.4	181	170	194	149	114
Sr	351.478	403.707	343	438	572	887	518.566	565.522	644.566	614.04	802	644	371.412	331.115	382.451	363.126	365	316	360.562	367.839	362.434	359.851	310	288	119	211	196	206	381
Y	35.0503	49.0585	37.5	31.6	32.1	30.2	22.4382	21.0664	20.5826	21.661	20.7	23.2	18.0427	14.0415	9.88247	14.6115	10.3	8.89	17.4785	13.3251	6.95425	17.504	6.36	6.45	5.11	4.81	4.44	4.15	10.2
Zr	465.807	292.255	171	149	190	197	148.579	136.543	139.092	177.069	84.3	76.1	242.85	144.495	129.115	159.952	122	161	166.136	163.132	193.262	177.398	187	217	123	192	198	196	151
Nb	60.7574	134.964	78	70.2	61	58.9	18.9425	18.2693	16.9282	17.8985	17.1	18.4	27.9036	23.6903	20.7077	31.4948	19.5	16.9	24.0645	19.737	14.6169	25.8197	12.4	13.5	12.2	16.4	15.9	15.2	15.6
Cs	10.3782	22.7006	4.82	10.9	4.41	6.57	2.13914	3.49034	2.23459	2.71214	2.33	3.86	1.61203	4.69537	4.52545	7.17075	6.02	4.6	3.84347	3.35865	3.4577	4.35595	2.51	2.66	2.23	2.51	2.91	2.2	2.98
Ba	1389.27	376.151	372	416	374	606	1869.32	2410.47	2301.04	2294.54	1010	808	2554.44	1162	1290.63	763.51	1240	943	1650.03	1440.63	1413.65	1645.65	793	780	721	1370	1430	1430	842
La	100.796	74.5993	73.8	52.8	49.1	67.2	55.2924	53.5088	52.9462	53.9691	47	44.5	61.3898	43.8324	31.4189	46.5356	36.6	38.3	34.3083	34.61	40.5995	28.6184	43.7	42	18.3	16.1	23.3	28.6	33.2
Ce	192.165	193.925	80.3	63.8	60.3	74.3	110.566	104.746	104.433	104.453	65.9	74.8	111.378	76.0804	54.7104	83.0042	58.6	68.8	64.6704	63.9755	74.28	59.6652	77.9	82.6	25.7	38.8	48	54.5	60.6
Pr	20.7844	21.9533	17.9	13.2	12.9	16.8	12.3725	11.6102	11.5834	11.5674	10.2	9.82	12.0925	7.71525	5.63781	8.55553	5.91	6.96	7.36259	7.19192	8.17424	6.74833	8.55	8.48	3.43	3.31	4.52	5.61	6.62
Nd	63.9815	69.549	58.2	43.4	42.9	57.9	42.1249	39.8653	39.9739	39.5919	36.9	35.5	38.4182	22.7614	16.4512	25.4865	17.8	22.7	23.8916	22.834	25.5388	22.6928	27.7	27.5	12	11.8	15.2	18.6	22.2
Sm	9.90861	11.6766	9.54	7.29	7.43	10.2	7.38789	7.00625	7.17388	7.10281	6.85	6.71	6.11719	3.51659	2.57497	4.00091	2.77	3.7	4.12502	3.91434	4.07704	4.16041	4.43	4.31	1.97	2.11	2.3	2.61	3.88
Eu	2.11519	2.24842	2	1.58	1.88	3.71	2.13564	2.31941	2.28504	2.24593	2.21	1.93	1.6752	0.871509	0.750854	0.881947	0.702	0.931	1.14493	1.00438	0.994593	1.12249	1.14	1.12	0.462	0.603	0.549	0.634	1.19
Gd	9.20134	10.8536	7.31	5.73	5.73	7.47	7.15484	6.88074	7.075	6.88662	5.19	5.44	5.8253	3.55687	2.51608	3.91574	2.13	2.63	3.88491	3.59506	3.34541	3.68698	2.75	2.73	1.37	1.59	1.52	1.54	2.83
Tb	1.15355	1.4025	1.11	0.886	0.908	1.08	0.873566	0.864862	0.881068	0.872117	0.783	0.818	0.727367	0.454452	0.304201	0.464346	0.322	0.364	0.496425	0.467384	0.34414	0.492922	0.368	0.372	0.189	0.204	0.208	0.212	0.404
Dy	5.58364	6.84886	5.51	4.52	4.68	4.9	3.96743	4.0592	4.03885	4.09437	3.87	4.21	3.24753	2.26234	1.45437	2.33424	1.54	1.6	2.47762	2.19117	1.37244	2.4564	1.29	1.34	0.822	0.908	0.843	0.748	1.85
Ho	1.1225	1.3827	1.09	0.911	0.931	0.868	0.741817	0.753203	0.785217	0.73561	0.704	0.796	0.586853	0.470926	0.3082	0.480531	0.309	0.284	0.504534	0.428189	0.223115	0.508844	0.205	0.212	0.148	0.157	0.147	0.128	0.329
Er	3.26342	4.22085	3.67	3.09	3.16	2.75	1.94253	2.00772	2.03774	1.92182	2.04	2.32	1.58808	1.33458	0.891072	1.37881	1.03	0.891	1.52937	1.20771	0.596963	1.55956	0.585	0.602	0.463	0.462	0.41	0.35	0.955
Tm	0.625307	0.815616	0.592	0.519	0.504	0.393	0.3052	0.33795	0.325612	0.313816	0.267	0.329	0.28731	0.262804	0.164928	0.266127	0.16	0.125	0.291909	0.207424	0.0969027	0.290697	0.07	0.0744	0.0679	0.0641	0.0582	0.0478	0.14
Yb	4.39301	6.35634	4.46	3.98	3.73	2.63	1.9573	2.06858	2.08136	1.98689	1.67	2.05	1.82387	1.81781	1.37178	2.02348	1.16	0.847	2.04697	1.44744	0.589567	2.10711	0.449	0.466	0.504	0.438	0.413	0.341	0.899
Lu	0.696237	1.12546	0.807	0.718	0.688	0.422	0.300631	0.30252	0.29825	0.308343	0.257	0.311	0.295493	0.275138	0.207993	0.336789	0.198	0.144	0.332452	0.209236	0.0932801	0.33042	0.0687	0.0632	0.0906	0.0675	0.0615	0.0555	0.142
Hf	11.7726	9.24893	4.9	4.28	5.43	5.3	3.74807	4.18453	3.78113	4.54448	2.36	2.33	6.66354	4.60228	4.32773	5.54472	3.51	4.57	4.69602	5.04061	5.27571	5.15777	4.78	5.73	3.75	4.84	5.09	5.37	4.1
Ta	5.84615	11.6647	6.36	5.44	5.27	4.21	1.2007	1.38087	1.2003	1.15948	1.18	1.34	2.17755	2.47909	2.02221	3.34219	1.85	2.11	2.00462	1.94291	1.24977	1.99245	0.969	1.06	0.964	1.08	1.17	0.745	1.36
Pb	34.9145	33.4266	20.1	17.9	45.5	36	18.9791	24.9193	21.2241	19.4128	20.6	21.9	28.3673	26.1097	25.399	24.1809	25.1	36	36.3174	32.9434	30.1576	35.6059	28.2	28.9	133	104	175	73	26.2
Th	16.0133	12.2147	12.7	9.04	11.3	21.7	10.1477	12.2325	10.6089	10.1148	12.1	15	21.4222	26.9645	24.1847	32.8835	25.8	15.6	18.4537	15.5255	23.9516	14.0724	25.4	18.9	12.3	12.3	12.1	17.4	16.1
U	2.94705	7.05909	5.28	8.14	4.84	5.09	1.76147	2.82464	2.20022	2.24836	2.74	2.38	3.18293	2.77182	4.27052	6.93907	3.74	1.92	5.03009	2.48533	3.6079	3.48823	2.16	1.37	2.98	1.72	1.28	2	2.13
(La/Yb)N	16.4581	8.41837	11.8692	9.51593	9.4422	18.328	20.2632	18.5547	18.2468	19.4837	20.1875	15.5706	24.1436	17.2961	16.4288	16.4963	22.632	32.4352	12.0223	17.1514	49.3956	9.74224	69.8129	64.6493	26.0448	26.3665	40.4675	60.1606	26.4898
(Gd/Yb)N	1.73271	1.41255	1.35587	1.19099	1.27082	2.34964	3.02398	2.75169	2.812	2.86727	2.57092	2.19524	2.64217	1.61867	1.51731	1.60085	1.519	2.56868	1.57003	2.05467	4.69411	1.44751	5.06668	4.84634	2.24868	3.00303	3.0446	3.73597	2.60414
δEu	0.677238	0.610598	0.732185	0.747377	0.880866	1.29938	0.898031	1.02127	0.980567	0.98175	1.13315	0.976608	0.857935	0.753356	0.901843	0.681208	0.88355	0.91242	0.874376	0.818538	0.823326	0.8762	0.998528	0.99821	0.85975	1.00647	0.897657	0.96679	1.0979
